# Supplementary material for: Potential Risks of PM2.5-Bound Polycyclic Aromatic Hydrocarbons and Heavy Metals from Inland and Marine Directions for a Marine Background Site in North China
Source: MDPI journal article supplement (doi:10.3390/toxics10010032), 2022-01-11
Supplement: s1 [file s1]

# Supplementary Materials: Potential Risks of PM<sub>2.5</sub>-Bound Polycyclic Aromatic Hydrocarbons and Heavy Metals from Inland and Marine Directions for a Marine Background Site in North China

Qianqian Xue, Yingze Tian, Xinyi Liu, Xiaojun Wang, Bo Huang, Hongxia Zhu and Yinchang Feng

## Text S1. The backward trajectory analysis

To identify the potential directions of air masses and the effect of different transport routes on particle chemical compositions in TI, the backward trajectory was calculated during the sampling period. Five groups of air masses were identified according to their transport directions and area of travel (Figure 3). Cluster 1 (the southeast direction: SE) accounted for 17.7% of the total trajectories, originating from the Huang Sea and passing inland over Yantai, and clearly showed shorter transport patterns. Cluster 2 (the northern direction: N) accounted for 11.8% of the total, beginning in Inner Mongolia and passing through the Liaoning. Cluster 3 (the northwest direction: NW) accounted for 14.0% of the total, originating from Outer Mongolia and crossing over Inner Mongolia and Liaoning province, constituted long-range transport patterns. Cluster 4 (the west-northwest direction: WNW) accounted for 15.0% of the total, beginning in Outer Mongolia and passing through the Inner Mongolia and the Beijing–Tianjin–Hebei region. Cluster 5 (the southwest direction: SW) accounted for 41.6% of the total, originating in the Bohai Sea before arriving at TI.

## Text S2. Diagnostic ratios

Hopanes and steranes are emitted by lubricating oils in gasoline and diesel vehicles, while hopanes are also present in the smoke of coal combustion [1–4]. Configurations of hopanes can be employed to identify fossil fuels of different levels of maturity [2]. Alkanes with different carbon numbers can distinguish natural sources from anthropogenic sources [5–7]. What is more, diagnostic ratios of tracers were also used to identify the sources [8]. Usually, V and Ni are considered as tracers of heavy fuel oil combustion, and they are employed as typical tracers of ship emissions when V/Ni and V/Pb are higher than 0.7 and 0.27 [9–10], respectively. The IcdP/(IcdP + BghiP) and Flt/(Flt + Pyr) are used to distinguish different fossil fuels [8, 11–12]. BaP degrades faster than BeP, which may be strongly influenced by photodegradation and long-distance transport [11, 13–14]. The lowest C29 $\alpha$ /C30 $\alpha$  value for hopane can also be used to judge fossil fuels [15]. The homohopane index C34[S/(S+R)] can distinguish fuel maturity, which is defined as:

**Citation:** Xue, Q.; Tian, Y.; Liu, X.; Wang, X.; Huang, B.; Zhu, H.; Feng, Y. Potential Risks of PM<sub>2.5</sub>-Bound Polycyclic Aromatic Hydrocarbons and Heavy Metals from Inland and Marine Directions for a Marine Background Site in North China. *Toxics* **2022**, *10*, 32. <https://doi.org/10.3390/toxics10010032>

Academic Editors: Matthias Karl; Yuan Cheng

Received: 22 November 2021

Accepted: 05 January 2022

Published: 11 January 2022

**Publisher's Note:** MDPI stays neutral with regard to jurisdictional claims in published maps and institutional affiliations.

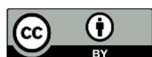

**Copyright:** © 2022 by the authors. Submitted for possible open access publication under the terms and conditions of the Creative Commons Attribution (CC BY) license (<https://creativecommons.org/licenses/by/4.0/>).

$$C34[S/(S + R)] = \frac{C34\alpha\beta S}{C34\alpha\beta S + C34\alpha\beta R} \quad (1)$$

For n-alkanes, the carbon preference index (CPI) can reflect the comparison between natural and anthropogenic contributions, which is defined as the ratio of the total concentration of odd n-alkanes to that of even n-alkanes [16]:

$$CPI = \frac{\sum_{i=5}^{16} C_{2i+1}}{\sum_{i=5}^{16} C_{2i}} \quad (2)$$

where  $i$  is the carbon number. Due to the fact that plant wax n-alkanes show strong odd carbon number predominance, biogenic n-alkanes should have CPI values greater than unity, whereas anthropogenic n-alkanes should have CPI values close to unity [16].

Lower values of C29/C17 for n-alkanes and terrigenous-to-aquatic ratios (TAR) implied increased contributions from aquatic inputs [16].

$$TAR = C27 + C29 + C31 / C15 + C17 + C19 \quad (3)$$

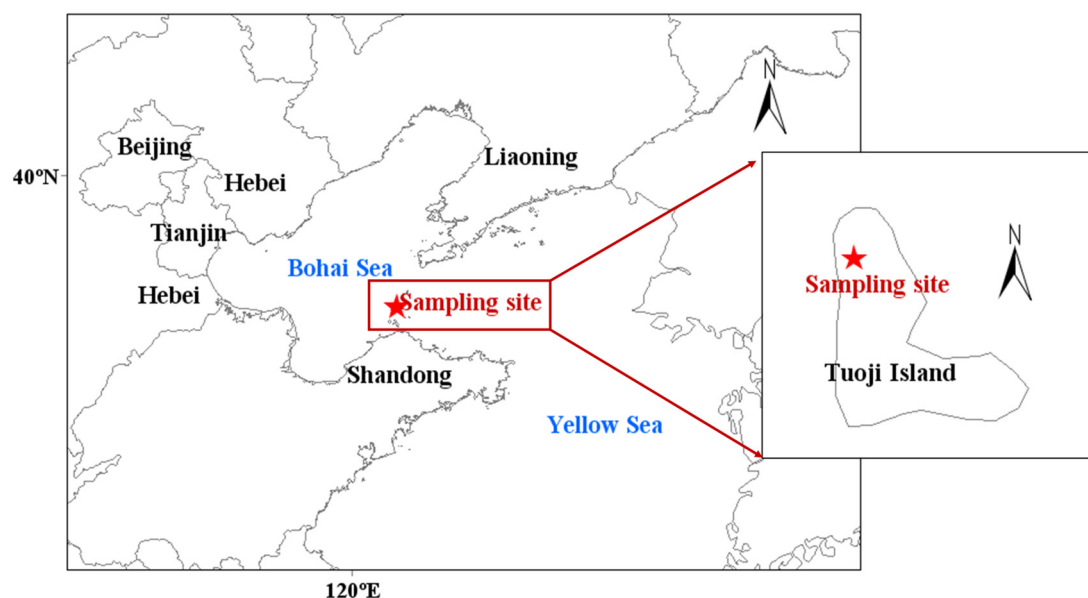

**Figure S1.** Location of the sampling site and the adjacent provinces and municipalities.

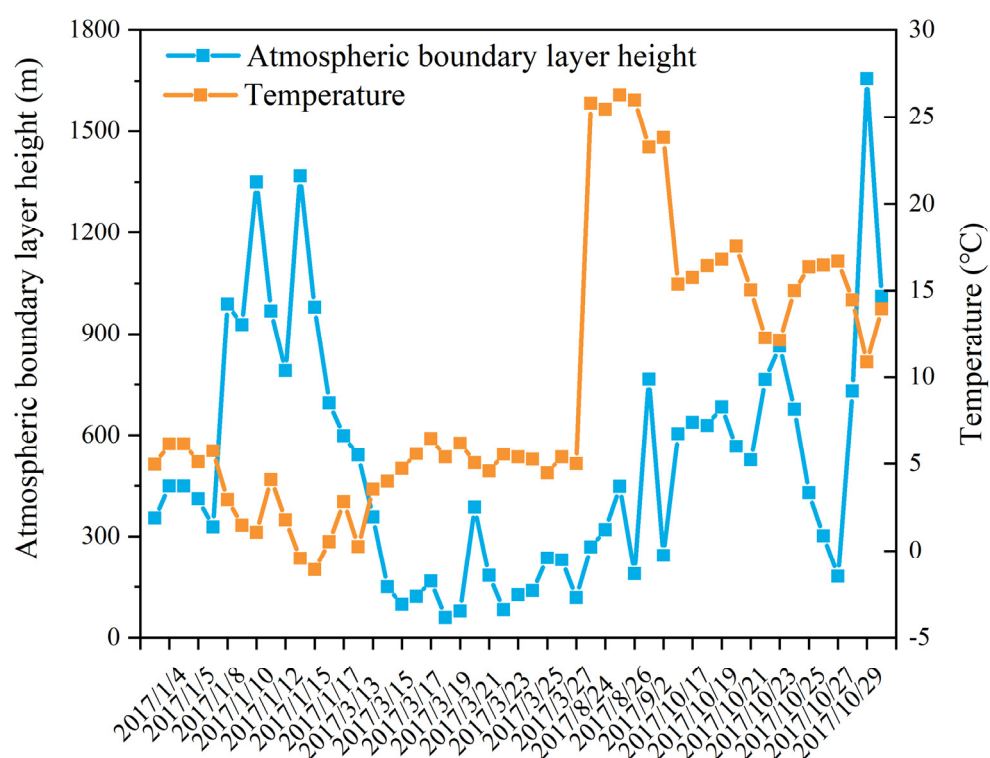

**Figure S2.** The atmospheric boundary layer height and temperature of the sampling site during the sampling periods.

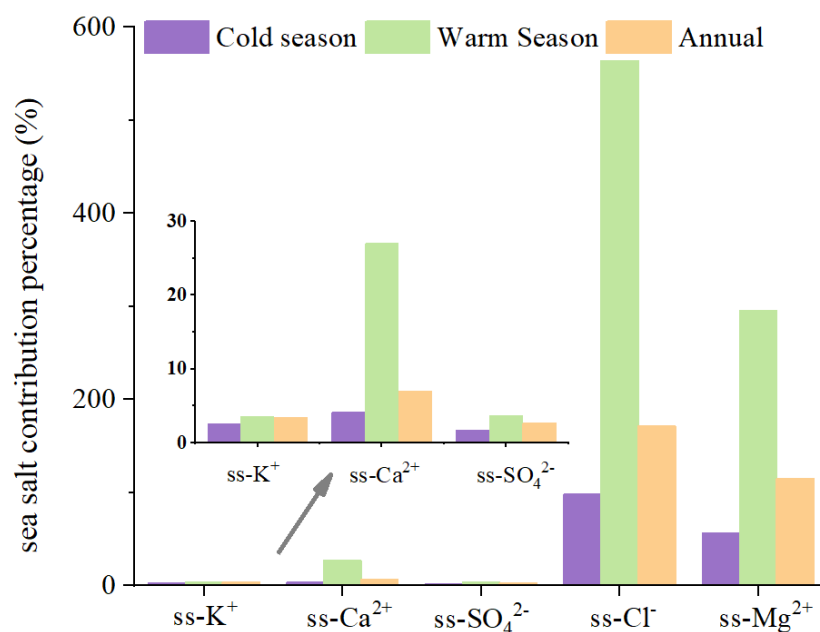

**Figure S3.** The warm and cold seasonal percentages of K<sup>+</sup>, Mg<sup>2+</sup>, Ca<sup>2+</sup>, Cl<sup>-</sup>, and SO<sub>4</sub><sup>2-</sup> from sea salt accounting for total amount of the corresponding chemical species.

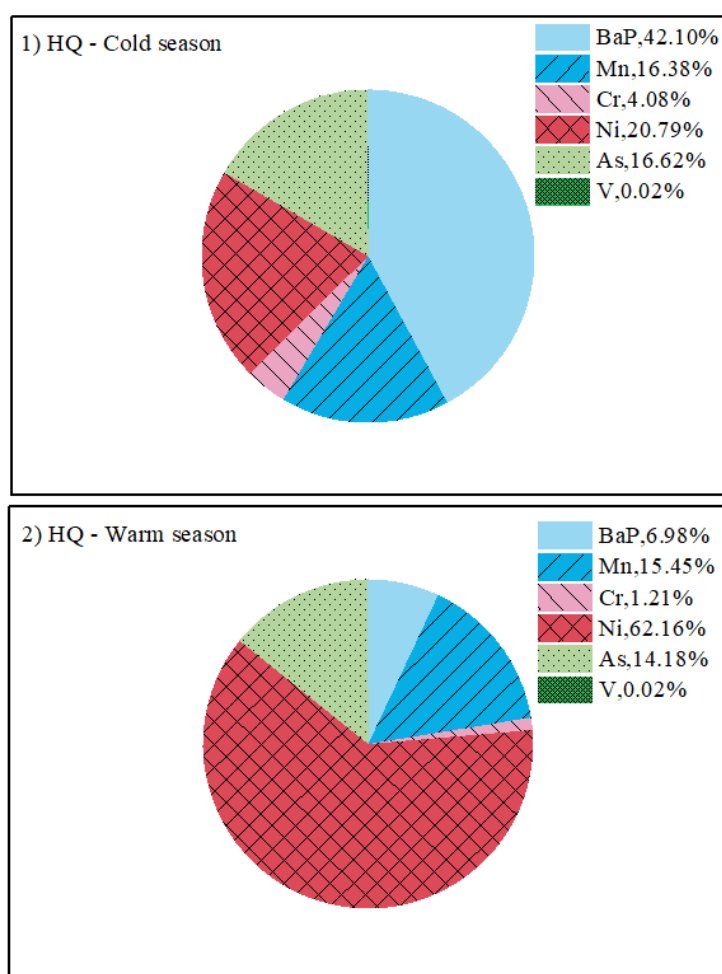

**Figure S4.** The warm and cold seasonal proportion of the HQ of each component (PAHs and HMs) relative to the total HQ.

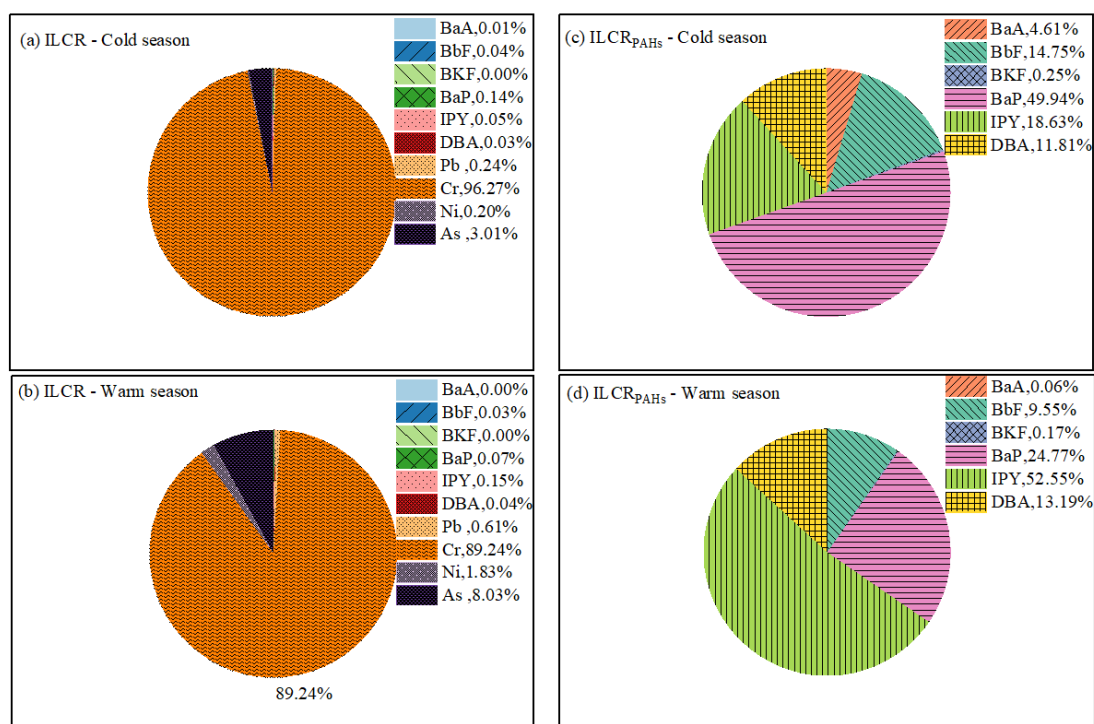

**Figure S5.** The warm and cold seasonal proportions of ILCR of each component (PAHs and HMs) relative to the total ILCR.

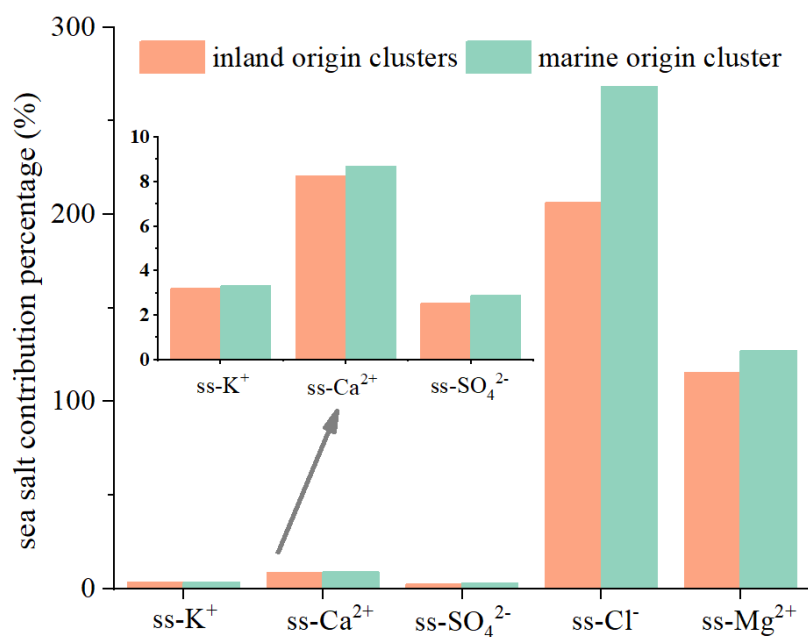

**Figure S6.** The percentages of  $K^+$ ,  $Mg^{2+}$ ,  $Ca^{2+}$ ,  $Cl^-$ , and  $SO_4^{2-}$  from sea salt accounting for the total amount of the corresponding chemical species from inland- and marine-origin clusters.

**Table S1.** The detailed researched compounds for conventional and organic components.

| Full name            | Abbreviation                  | Manufacturer  | Full name                                               | Abbreviation               | Manufacturer |
|----------------------|-------------------------------|---------------|---------------------------------------------------------|----------------------------|--------------|
| Aluminum             | Al                            | As-One, Japan | Indeno(1,2,3-cd)pyrene                                  | IcdP                       | 02si, USA    |
| Arsenic              | As                            | As-One, Japan | Dibenzo(a,h)anthracene                                  | DBA                        | 02si, USA    |
| Calcium              | Ca                            | As-One, Japan | Benzo(g,hi)perylene                                     | BghiP                      | 02si, USA    |
| Cadmium              | Cd                            | As-One, Japan | Coronene                                                | Cor                        | 02si, USA    |
| Cobalt               | Co                            | As-One, Japan | 17 $\alpha$ (H),21 $\beta$ (H)-(22R)-Tetrakishomohopane | C34 $\alpha\beta$ S        | 02si, USA    |
| Chromium             | Cr                            | As-One, Japan | 17 $\alpha$ (H),21 $\beta$ (H)-(22S)-Tetrakishomohopane | C34 $\alpha\beta$ R        | 02si, USA    |
| Copper               | Cu                            | As-One, Japan | 17 $\alpha$ (H)-22,29,30-Trisnorhopane <sup>TM</sup>    | C27 $\alpha$               | 02si, USA    |
| Iron                 | Fe                            | As-One, Japan | 17 $\alpha$ (H),21 $\beta$ (H)-Hopane                   | C30 $\alpha\beta$          | 02si, USA    |
| Potassium            | K                             | As-One, Japan | 17 $\beta$ (H),21 $\alpha$ (H)-Hopane                   | C30 $\beta\alpha$          | 02si, USA    |
| Magnesium            | Mg                            | As-One, Japan | 17 $\beta$ (H),21 $\beta$ (H)-Hopane                    | C30 $\beta\beta$           | 02si, USA    |
| Manganese            | Mn                            | As-One, Japan | 17 $\alpha$ (H),21 $\beta$ (H)-30-Norhopane             | C29 $\alpha\beta$          | 02si, USA    |
| Sodium               | Na                            | As-One, Japan | $\alpha\alpha\alpha$ (20R)-Cholestane                   | C27 $\alpha\alpha\alpha$ R | 02si, USA    |
| Nickel               | Ni                            | As-One, Japan | $\alpha\alpha\alpha$ (20S)-Cholestane                   | C27 $\alpha\alpha\alpha$ S | 02si, USA    |
| Lead                 | Pb                            | As-One, Japan | n-Tridecane                                             | C13                        | 02si, USA    |
| Silicon              | Si                            | As-One, Japan | n-Tetradecane                                           | C14                        | 02si, USA    |
| Titanium             | Ti                            | As-One, Japan | n-Pentadecane                                           | C15                        | 02si, USA    |
| Vanadium             | V                             | As-One, Japan | n-Hexadecane                                            | C16                        | 02si, USA    |
| Zinc                 | Zn                            | As-One, Japan | n-Heptadecane                                           | C17                        | 02si, USA    |
| Organic carbon       | OC                            | As-One, Japan | n-Octadecane                                            | C18                        | 02si, USA    |
| Elemental carbon     | EC                            | As-One, Japan | n-Nonadecane                                            | C19                        | 02si, USA    |
| Nitrate ion          | NO <sub>3</sub> <sup>-</sup>  | SIMS,ChIna    | n-Eicosane                                              | C20                        | 02si, USA    |
| Sulfate ions         | SO <sub>4</sub> <sup>2-</sup> | SIMS,ChIna    | n-Heneicosane                                           | C21                        | 02si, USA    |
| Ammonium ion         | NH <sub>4</sub> <sup>+</sup>  | SIMS,ChIna    | n-Docosane                                              | C22                        | 02si, USA    |
| Chloride ion         | Cl <sup>-</sup>               | SIMS,ChIna    | n-Tricosane                                             | C23                        | 02si, USA    |
| Sodium ion           | Na <sup>+</sup>               | SIMS,ChIna    | n-Tetracosane                                           | C24                        | 02si, USA    |
| Magnesium ions       | Mg <sup>2+</sup>              | SIMS,ChIna    | n-Pentacosane                                           | C25                        | 02si, USA    |
| Calcium ions         | Ca <sup>2+</sup>              | SIMS,ChIna    | n-Hexacosane                                            | C26                        | 02si, USA    |
| Potassium ion        | K <sup>+</sup>                | SIMS,ChIna    | n-Heptacosane                                           | C27                        | 02si, USA    |
| Naphthalene          | Nap                           | 02si, USA     | n-Octacosane                                            | C28                        | 02si, USA    |
| Acenaphthylene       | Any                           | 02si, USA     | n-Nonacosane                                            | C29                        | 02si, USA    |
| Acenaphthene         | Ana                           | 02si, USA     | n-Tricontane                                            | C30                        | 02si, USA    |
| Fluorene             | Flu                           | 02si, USA     | n-Hentriacontane                                        | C31                        | 02si, USA    |
| Phenanthrene         | Phe                           | 02si, USA     | n-Dotriacontane                                         | C32                        | 02si, USA    |
| Anthracene           | Ant                           | 02si, USA     | n-Tritriacontane                                        | C33                        | 02si, USA    |
| Fluoranthene         | Flt                           | 02si, USA     | n-Tetratriacontane                                      | C34                        | 02si, USA    |
| Pyrene               | Pyr                           | 02si, USA     | n-Pentadecane                                           | C35                        | 02si, USA    |
| Chrysene             | Chr                           | 02si, USA     | n-Hexadecane                                            | C36                        | 02si, USA    |
| Benzo(a)anthracene   | BaA                           | 02si, USA     | n-Heptadecane                                           | C37                        | 02si, USA    |
| Benzo(b)fluoranthene | BbF                           | 02si, USA     | n-Octacosane                                            | C38                        | 02si, USA    |
| Benzo(k)fluoranthene | BkF                           | 02si, USA     | n-Nonacosane                                            | C39                        | 02si, USA    |
| Benzo(a)pyrene       | BaP                           | 02si, USA     | n-Tetradecane                                           | C40                        | 02si, USA    |
| Benzo(e)pyrene       | BeP                           | 02si, USA     |                                                         |                            |              |

SIMS: Shandong Institute of Metallurgical Sciences.

**Table S2.** The limit of detection (LOD) and limit of quantitation (LOQ) for conventional and organic components.

| Name                          | LOD ( $\mu\text{g m}^{-3}$ ) | LOQ ( $\mu\text{g m}^{-3}$ ) | Name                       | LOD ( $\mu\text{g m}^{-3}$ ) | LOQ ( $\mu\text{g m}^{-3}$ ) | Name | LOD ( $\mu\text{g m}^{-3}$ ) | LOQ ( $\mu\text{g m}^{-3}$ ) |
|-------------------------------|------------------------------|------------------------------|----------------------------|------------------------------|------------------------------|------|------------------------------|------------------------------|
| Al                            | 0.0476                       | 0.1904                       | K <sup>+</sup>             | 0.05                         | 0.2                          | C13  | 0.00199                      | 0.00796                      |
| As                            | 0.0064                       | 0.0256                       | Nap                        | 0.0002                       | 0.0008                       | C14  | 0.01556                      | 0.06224                      |
| Ca                            | 0.2605                       | 1.042                        | Any                        | 0.00657                      | 0.02628                      | C15  | 0.00552                      | 0.02208                      |
| Cd                            | 0.0003                       | 0.0012                       | Flu                        | 0.0006                       | 0.0024                       | C16  | 0.03227                      | 0.12908                      |
| Co                            | 0.0008                       | 0.0032                       | Phe                        | 0.0005                       | 0.002                        | C17  | 0.02142                      | 0.08568                      |
| Cr                            | 0.0007                       | 0.0028                       | Ant                        | 0.0004                       | 0.0016                       | C18  | 0.02864                      | 0.11456                      |
| Cu                            | 0.0073                       | 0.0292                       | Flt                        | 0.0004                       | 0.0016                       | C19  | 0.01334                      | 0.05336                      |
| Fe                            | 0.0416                       | 0.1664                       | Pyr                        | 0.0004                       | 0.0016                       | C20  | 0.01836                      | 0.07344                      |
| K                             | 0.0191                       | 0.0764                       | Chr                        | 0.0007                       | 0.0028                       | C21  | 0.00692                      | 0.02768                      |
| Mg                            | 0.0126                       | 0.0504                       | BaA                        | 0.0005                       | 0.002                        | C22  | 0.02002                      | 0.08008                      |
| Mn                            | 0.0004                       | 0.0016                       | BbF                        | 0.0009                       | 0.0036                       | C23  | 0.0217                       | 0.0868                       |
| Na                            | 0.021                        | 0.084                        | BkF                        | 0.0007                       | 0.0028                       | C24  | 0.01376                      | 0.05504                      |
| Ni                            | 0.00033                      | 0.00132                      | BaP                        | 0.0009                       | 0.0036                       | C25  | 0.01596                      | 0.06384                      |
| Pb                            | 0.0044                       | 0.0176                       | BeP                        | 0.0003                       | 0.0012                       | C26  | 0.01218                      | 0.04872                      |
| Si                            | 0.0304                       | 0.1216                       | IcdP                       | 0.0009                       | 0.0036                       | C27  | 0.0116                       | 0.0464                       |
| Ti                            | 0.0002                       | 0.0008                       | DBA                        | 0.0007                       | 0.0028                       | C28  | 0.02412                      | 0.09648                      |
| V                             | 0.0008                       | 0.0032                       | BghiP                      | 0.0006                       | 0.0024                       | C29  | 0.01316                      | 0.05264                      |
| Zn                            | 0.006                        | 0.024                        | Cor                        | 0.0001                       | 0.0004                       | C30  | 0.01893                      | 0.07572                      |
| OC                            | 0.82                         | 3.28                         | C34 $\alpha\beta$ S        | 0.0001                       | 0.0004                       | C31  | 0.01479                      | 0.05916                      |
| EC                            | 0.2                          | 0.8                          | C34 $\alpha\beta$ R        | 0.00015                      | 0.0006                       | C32  | 0.01265                      | 0.0506                       |
| NO <sub>3</sub> <sup>-</sup>  | 0.12                         | 0.48                         | C27 $\alpha$               | 0.00013                      | 0.00052                      | C33  | 0.0088                       | 0.0352                       |
| SO <sub>4</sub> <sup>2-</sup> | 0.34                         | 1.36                         | C30 $\alpha\beta$          | 0.00094                      | 0.00376                      | C35  | 0.00212                      | 0.00848                      |
| NH <sub>4</sub> <sup>+</sup>  | 0.25                         | 1                            | C30 $\beta\alpha$          | 0.00148                      | 0.00592                      | C37  | 0.00069                      | 0.00276                      |
| Cl <sup>-</sup>               | 0.11                         | 0.44                         | C30 $\beta\beta$           | 0.00016                      | 0.00064                      | C38  | 0.00136                      | 0.00544                      |
| Na <sup>+</sup>               | 0.06                         | 0.24                         | C29 $\alpha\beta$          | 0.00002                      | 0.00008                      | C39  | 0.00037                      | 0.00148                      |
| Mg <sup>2+</sup>              | 0.06                         | 0.24                         | C27 $\alpha\alpha\alpha$ R | 0.00003                      | 0.00012                      | C40  | 0.00024                      | 0.00096                      |
| Ca <sup>2+</sup>              | 0.26                         | 1.04                         | C27 $\alpha\alpha\alpha$ S | 0.00011                      | 0.00044                      |      |                              |                              |

**Table S3.** Diagnostic ratios of tracer species.

|                                                               | Gasoline vehicles | Diesel vehicles | Coal emission | Ship emission | Photo-degradation | Aquatic macrophytes and plankton | References | Cluster 1 | Cluster 2 | Cluster 3 |
|---------------------------------------------------------------|-------------------|-----------------|---------------|---------------|-------------------|----------------------------------|------------|-----------|-----------|-----------|
| OC/EC                                                         | High              | Low             | Low           | Low           |                   |                                  | [2,17]     | 3.43      | 3.45      | 2.96      |
| V/Ni                                                          |                   |                 |               | > 0.7         |                   |                                  | [9,10]     | 0.42      | 0.17      | 0.43      |
| V/Pb                                                          |                   |                 |               | > 0.27        |                   |                                  | [9,10]     | 0.16      | 0.14      | 0.25      |
| Cu/Zn                                                         | Low               | High            |               | High          |                   |                                  | [1]        | 0.15      | 0.13      | 0.15      |
| Flt/(Flt+Pyr)                                                 | 0.4–0.5           | 0.60–0.70       | > 0.5         |               |                   |                                  | [11,12]    | 0.55      | 0.56      | 0.61      |
| BaP/BeP                                                       |                   |                 |               |               | < 0.4             |                                  | [13,14]    | 0.51      | 0.44      | 0.57      |
| IcdP/(IcdP+Bghi p)                                            | 0.12–0.22 (0.18)  | > 0.3 (0.37)    | (> 0.5) 0.58  |               |                   |                                  | [11,12]    | 0.26      | 0.41      | 0.29      |
| Cmax                                                          | C23;C25           | C17;C20         |               | C17           |                   |                                  | [16]       | C17       | C18       | C16       |
| TAR                                                           | High              | High            | High          | High          | High              | Low                              | [16]       | 0.33      | 0.41      | 0.43      |
| C29/C17                                                       | High              | High            | High          | High          | High              | Low                              | [16]       | 0.18      | 0.15      | 0.24      |
| C34 $\alpha\beta$ S/C34 $\alpha\beta$ S + C34 $\alpha\beta$ R | 0.6               | 0.5             | 0.1–0.4       |               |                   |                                  | [15]       | 0.54      | 0.59      | 0.41      |
| C29 $\alpha\beta$ /C30 $\alpha\beta$                          | 0.6–0.7           | 0.4             | 0.6–2.0       |               |                   |                                  | [15]       | 0.20      | 0.16      | 0.24      |
| CPI                                                           |                   |                 | < 2           |               |                   |                                  | [16]       | 1.25      | 1.71      | 1.56      |

The terrigenous-to-aquatic ratio (TAR) was calculated by  $C27 + C29 + C31/C15 + C17 + C19$ .

**Table S4.** The parameters (EF, ED, BW, AT) used in CDI formulas.

| Abbreviation | Full name                   | Unit                 | Adult | References |
|--------------|-----------------------------|----------------------|-------|------------|
| C            | Concentration of components | $\mu\text{g m}^{-3}$ |       |            |

|                          |                    |                                  |       |         |
|--------------------------|--------------------|----------------------------------|-------|---------|
| InhR                     | Inhalation rate    | m <sup>3</sup> day <sup>-1</sup> | 20    | [17,18] |
| EF                       | Exposure frequency | Days years <sup>-1</sup>         |       |         |
| ED                       | Exposure duration  | Years                            | 30    | [19,20] |
| BW                       | Body weight        | kg                               | 70    | [19,20] |
| AT <sub>non-cancer</sub> | Average time       | Days                             | 10950 | [19,20] |
| AT <sub>cancer</sub>     |                    |                                  | 25550 | [19,20] |

Table S5. The *SFi* values of the HMs and PAHs.

| Name | RfDinh                  | SF    | References |
|------|-------------------------|-------|------------|
| BaA  | /                       | 0.21  | [19,20]    |
| CHR  | /                       | 0     | [19,20]    |
| BbF  | /                       | 0.21  | [19,20]    |
| BkF  | /                       | 0.02  | [19,20]    |
| BaP  | 5.71 × 10 <sup>-7</sup> | 2.1   | [19,20]    |
| DBA  | /                       | 2.1   | [19,20]    |
| IPY  | /                       | 0.21  | [19,20]    |
| Fe   | /                       | 42    | [19,20]    |
| Mn   | 1.43 × 10 <sup>-5</sup> | 9.8   | [19,20]    |
| Cu   | /                       | 0.84  | [19,20]    |
| Zn   | /                       | 15.1  | [19,20]    |
| Pb   | /                       | 0.28  | [19,20]    |
| Cr   | 2.86 × 10 <sup>-5</sup> | 294   | [19,20]    |
| Ni   | 4.00 × 10 <sup>-6</sup> | 0.84  | [19,20]    |
| As   | 4.29 × 10 <sup>-6</sup> | 15.05 | [19,20]    |
| V    | 2.86 × 10 <sup>-3</sup> | /     | [19,20]    |

## References:

- Iakovides, M.; Iakovides, G.; Stephanou, E.G. Atmospheric particle-bound polycyclic aromatic hydrocarbons, n-alkanes, hopanes, steranes and trace metals: PM2.5 source identification, individual and cumulative multi-pathway lifetime cancer risk assessment in the urban environment. *Sci. Total Environ.* **2021**, *752*, 141834.
- Esmailirad, S.; Lai, A.; Abbaszade, G.; Schnelle-Kreis, J.; Zimmermann, R.; Uzu, G.; Daellenbach, K.; Canonaco, F.; Hassankhany, H.; Arhami, M.; Baltensperger, U.; Prévôt, A.S.H.; Schauer, J.J.; Jaffrezzo, J.-L.; Hosseini, V.; El Haddad, I. Source apportionment of fine particulate matter in a Middle Eastern Metropolis, Tehran-Iran, using PMF with organic and inorganic markers. *Sci. Total Environ.* **2020**, *705*, 135330.
- Galvao, E.S.; Reis, Jr N.C.; Lima, A.T.; Stuetz, R.M.; D'Azeredo, O.M.T.; Santos, J.M. Use of inorganic and organic markers associated with their directionality for the apportionment of highly correlated sources of particulate matter. *Sci. Total Environ.* **2019**, *651*, 1332-1343.
- Kang, M.J.; Ren, L.J.; Ren, H.; Zhao, Y.; Kawamura, K.; Zhang, H.L.; Wei, L.F.; Sun, Y.L.; Wang, Z.F.; Fu, P.Q. Primary biogenic and anthropogenic sources of organic aerosols in Beijing, China: Insights from saccharides and n-alkanes. *Environ. Pollut.* **2018**, *243*, 1579-1587.
- Pereira, G.M.; Teinila, K.; Custodio, D.; Santos, A.G.; Xian, H.; Hillamo, R.; Alves, C.A.; de Andrade, J.B.; da Rocha, G.O.; Kumar, P.; Balasubramanian, R.; Andrade, M.D.F.; Vasconcellos, P.D.C. Particulate pollutants in the Brazilian city of Sao Paulo: 1-year investigation for the chemical composition and source apportionment. *Atmos. Chem. Phys.* **2017**, *17*, 11943-11969.
- Souza, M.R.R.; Suzarte, J.S.; Carmo, L.O.; Santos, E.; Soares, L.S.; Júnior, A.R.V.; Santos, L.G.G.V.; Krause, L.C.; Damasceno, F.C.; Frena, M.; Alexandre, M.R. Assessment of polycyclic aromatic hydrocarbons in three environmental components from a tropical estuary in Northeast Brazil. *Mar. Pollut. Bull.* **2021**, *171*, 112726.
- Vaezzadeh, V.; Yi, X.; Rais, F.R.; Bong, C.W.; Thomes, M.W.; Lee, C.W.; Zakaria, M.P.; Wang, A.J.; Zhong, G.C.; Zhang, G. Distribution of black carbon and PAHs in sediments of Peninsular Malaysia. *Mar. Pollut. Bull.* **2021**, *172*, 112871.
- Tobiszewski, M.; Namieśnik, J. PAH diagnostic ratios for the identification of pollution emission sources. *Environ. Pollut.* **2012**, *162*, 110-119.
- Zhang, F.; Chen, Y.J.; Tian, C.G.; Wang, X.P.; Huang, G.P.; Fang, Y.; Zong, Z. Identification and quantification of shipping emissions in Bohai Rim, China. *Sci. Total Environ.* **2014**, *497-498*, 570-577.
- Mamoudou, I.; Zhang, F.; Chen, Q.; Wang, P.; Chen, Y. Characteristics of PM2.5 from ship emissions and their impacts on the ambient air: A case study in Yangshan Harbor, Shanghai. *Sci. Total Environ.* **2018**, *640-641*, 207-216.
- Zhang, J.M.; Yang, L.X.; Mellouki, A.; Chen, J.M.; Chen, X.F.; Gao, Y.; Jiang, P.; Li, Y.Y.; Yu, H.; Wang, W.X. Diurnal concentrations, sources, and cancer risk assessments of PM2.5-bound PAHs, NPAHs, and OPAHs in urban, marine and mountain environments. *Chemosphere*, **2018**, *209*, 147-155.



12. Chen, R.; Jia, B.; Tian, Y.Z.; Feng, Y.C. Source-specific health risk assessment of PM<sub>2.5</sub>-bound heavy metals based on high time-resolved measurement in a Chinese megacity: insights into seasonal and diurnal variations. *Ecotox. Environ. Saf.* **2021**, *216*, 112167.
13. Jin, L.; Xie, J.W.; Wong, C.K.C.; Chan, S.K.Y.; Abbaszade, G.; Schnelle-Kreis, J.; Zimmermann, R.; Li, J.; Zhang, G.; Fu, P.Q.; Li, X.D. Contributions of City-Specific Fine Particulate Matter (PM<sub>2.5</sub>) to Differential In Vitro Oxidative Stress and Toxicity Implications between Beijing and Guangzhou of China. *Environ. Sci. Technol.* **2019**, *53*, 2881-2891.
14. Kong, S.F.; Yan, Q.; Zheng, H.; Liu, H.B.; Wang, W.; Zheng, S.R.; Yang, G.W.; Zheng, M.M.; Wu, J.; Qi, S.H.; Shen, G.F.; Tang, L.L.; Yin, Y.; Zhao, T.L.; Yu, H.; Liu, D.T.; Zhao, D.L.; Zhang, T.; Ruan, J.J.; Huang, M.Z. Substantial reductions in ambient PAHs pollution and lives saved as a co-benefit of effective long-term PM<sub>2.5</sub> pollution controls. *Environ. Int.* **2018**, *114*, 266-279.
15. Tian, Y.Z.; Liu, X.; Huo, R.Q.; Shi, Z.B.; Sun, Y.M.; Feng, Y.C.; Harrison R.M. Organic compound source profiles of PM<sub>2.5</sub> from traffic emissions, coal combustion, industrial processes and dust. *Chemosphere*, **2021**, *278*, 130429.
16. Lyu, Y.; Xu, T.T.; Yang, X.; Chen, J.M.; Cheng, T.T.; Li, X. Seasonal contributions to size-resolved n-alkanes C<sub>8</sub>–C<sub>40</sub> in the Shanghai atmosphere from regional anthropogenic activities and terrestrial plant waxes. *Sci. Total Environ.* **2017**, *579*, 1918-1928.
17. Sun, Y.M.; Tian, Y.Z.; Xue, Q.Q.; Jia, B.; Wei, Y.; Song, D.L.; Huang, F.X.; Feng, Y.C. Source-specific risks of synchronous heavy metals and PAHs in inhalable particles at different pollution levels: Variations and health risks during heavy pollution. *Environ. Int.* **2021**, *146*, 106162.
18. US EPA. *Exposure Factors Handbook 2011 Edition (Final Report)*. U.S. Environmental Protection Agency, Washington, DC, EPA/600/R-09/052F, **2011**.
19. US EPA. *User's guide/technical background document for US EPA Region 9's RSL tables*. Washington, DC, US Environmental Protection Agency, **2013**.
20. Tian, Y.Z.; Li, Y.X.; Liang, Y.L.; Xue, Q.Q.; Feng, X.; Feng, Y.C. Size distributions of source-specific risks of atmospheric heavy metals: An advanced method to quantify source contributions to size-segregated respiratory exposure. *J. Hazard. Mater.* **2021**, *407*, 124355.
